# Supplementary material for: Unresected screen-detected ductal carcinoma in situ: Outcomes of 311 women in the Forget-Me-Not 2 study
Source: PubMed Central journal article supplement (PMC8753270; doi:10.1016/j.breast.2022.01.001), 2022-01-04
Supplement: mmc1.pdf [file mmc1.pdf]

**SLOANE PROJECT QUESTIONNAIRE FOR PATIENTS WITH NO OR DELAYED (>6 MONTHS) SURGICAL TREATMENT OF BIOPSY-PROVEN SCREEN-DETECTED DCIS: FORM 1 (DIAGNOSIS AND FOLLOW-UP)**

Please return completed forms to:

Karen Clements, Breast Cancer Research Manager, Public Health England Screening, 5 St Philip's Place, Birmingham, B3 2PW or email to phe.sloaneproject@nhs.net

NHS number:

Sx no:

DoB:

Treating hospital

Hospital number

Form completed by

Date of completion

Email

**ELIGIBILITY**

Has the patient had resection of the DCIS within 6 months of the abnormal screening mammogram?

No

Yes

Is the patient a randomised participant in the LORIS trial?

No

Yes

Does another exclusion criterion apply?

No

Yes

*If answer is Yes to any question, please give details overleaf & return form. Otherwise complete rest of form.*

**ASSESSMENT FINDINGS**

**Mammography**

Date of screening mammogram \_\_\_\_\_

Digital  Film/screen

Side: Right  Left

Site: UOQ  (tick all that apply)

UIQ

LOQ

LIQ

Retroareolar

Does the lesion contain microcalcification?

Yes  No

If yes, most suspicious pattern: (tick one)

Casting

Granular

Punctate

Distribution: (tick one)

Diffuse

Regional

Grouped

Linear

Segmental

Predominant mammographic feature: (tick one)

Calcification

Mass – well-defined

Mass – ill-defined

Distortion

Spiculate mass

None of above – state \_\_\_\_\_

Maximum size of lesion \_\_\_\_\_ mm

BI-RADS breast density: (tick one)

a

b

c

d

**Biopsy**

Procedure giving definitive DCIS diagnosis:

VAB  Gauge \_\_\_\_\_

14G core

Other  State \_\_\_\_\_

Mode:

Stereo/tomo

Ultrasound

Freehand

Number of cores \_\_\_\_\_

**Clinical examination**

P score (1-5) \_\_\_\_\_

Not performed

Not known

**Ultrasound**

U score (1-5) \_\_\_\_\_

Not performed

Not known

**SLOANE PROJECT QUESTIONNAIRE FOR PATIENTS WITH NO OR DELAYED (>6 MONTHS) SURGICAL TREATMENT OF BIOPSY-PROVEN SCREEN-DETECTED DCIS: FORM 1 (DIAGNOSIS AND FOLLOW-UP)**

|                                                                                                                                                                                                                                                                                                                                                                                                                                                                                                                                                          |                                                                                                                                                                                                                                                                                                                                                                                                                                                                                                                                                                                                                                                                                        |
|----------------------------------------------------------------------------------------------------------------------------------------------------------------------------------------------------------------------------------------------------------------------------------------------------------------------------------------------------------------------------------------------------------------------------------------------------------------------------------------------------------------------------------------------------------|----------------------------------------------------------------------------------------------------------------------------------------------------------------------------------------------------------------------------------------------------------------------------------------------------------------------------------------------------------------------------------------------------------------------------------------------------------------------------------------------------------------------------------------------------------------------------------------------------------------------------------------------------------------------------------------|
| <p><b><u>DCIS histology on core biopsy / VAB</u></b></p> <p>Laboratory number _____</p> <p><b>Nuclear grade (highest present):</b><br/>         Low <input type="checkbox"/><br/>         Intermediate <input type="checkbox"/><br/>         High <input type="checkbox"/></p> <p><b>Necrosis:</b><br/>         Yes <input type="checkbox"/><br/>         No <input type="checkbox"/></p> <p><b>Microinvasion:</b><br/>         Yes <input type="checkbox"/><br/>         Possible <input type="checkbox"/><br/>         No <input type="checkbox"/></p> | <p><b>Receptor status:</b></p> <p><b>ER</b>    Positive <input type="checkbox"/>         Score _____<br/>                   Negative <input type="checkbox"/><br/>                   Not known <input type="checkbox"/></p> <p><b>PR</b>    Positive <input type="checkbox"/>         Score _____<br/>                   Negative <input type="checkbox"/><br/>                   Not known <input type="checkbox"/></p> <p><b>HER2</b> Positive <input type="checkbox"/>         Score _____<br/>                   Negative <input type="checkbox"/><br/>                   Not known <input type="checkbox"/></p> <p><i>Please send copy of histopathology report with form</i></p> |
|----------------------------------------------------------------------------------------------------------------------------------------------------------------------------------------------------------------------------------------------------------------------------------------------------------------------------------------------------------------------------------------------------------------------------------------------------------------------------------------------------------------------------------------------------------|----------------------------------------------------------------------------------------------------------------------------------------------------------------------------------------------------------------------------------------------------------------------------------------------------------------------------------------------------------------------------------------------------------------------------------------------------------------------------------------------------------------------------------------------------------------------------------------------------------------------------------------------------------------------------------------|

**Reason for no initial surgery for DCIS**

Patient declined   
 Unfit for surgery   
 Other   
 State: \_\_\_\_\_

**Non-surgical treatment of DCIS**

None   
 Tamoxifen  (tick all that apply)  
 Aromatase inhibitor   
 Raloxifene   
 Radiotherapy   
 Other   
 State: \_\_\_\_\_

**Please give details of duration etc. below**

**FOLLOW-UP**

**Is the patient still alive?**  
 Yes   
 No   
 Not known

**If No, please state:**  
 Date of death \_\_\_\_\_  
 Cause of death \_\_\_\_\_

**Has the patient undergone further needle biopsy or surgery on either breast?**  
 Yes     If yes, please give details on FORM 2  
 No

**If no further biopsy or surgery:**  
 Date of last mammogram \_\_\_\_\_  
 Max. size of DCIS \_\_\_\_\_ mm  
 Any radiological evidence of invasive disease or new radiological abnormality?  
 Yes     If yes, please give details under ADDITIONAL INFORMATION  
 No

**ADDITIONAL INFORMATION**
