# Supplementary material for: Unresected screen-detected ductal carcinoma in situ: Outcomes of 311 women in the Forget-Me-Not 2 study
Source: PubMed Central journal article supplement (PMC8753270; doi:10.1016/j.breast.2022.01.001), 2022-01-04
Supplement: mmc2.pdf [file mmc2.pdf]

**SLOANE PROJECT QUESTIONNAIRE FOR PATIENTS WITH NO OR DELAYED (>6 MONTHS) SURGICAL TREATMENT OF BIOPSY-PROVEN SCREEN-DETECTED DCIS: FORM 2 (FURTHER BIOPSY OR SURGERY)**

Please return completed forms to:

Karen Clements, Breast Cancer Research Manager, Public Health England Screening, 5 St Philip's Place, Birmingham, B3 2PW or email to phe.sloaneproject@nhs.net

NHS number: \_\_\_\_\_ Sx no: \_\_\_\_\_ DoB: \_\_\_\_\_

Treating hospital: \_\_\_\_\_ Hospital number: \_\_\_\_\_

Form completed by: \_\_\_\_\_ Date of completion: \_\_\_\_\_

Email: \_\_\_\_\_

**REASON FOR FURTHER BIOPSY OR SURGERY**

|                                                                                                                                                                                                                                                                                         |                                                                                                                                                                                                                                                                                      |
|-----------------------------------------------------------------------------------------------------------------------------------------------------------------------------------------------------------------------------------------------------------------------------------------|--------------------------------------------------------------------------------------------------------------------------------------------------------------------------------------------------------------------------------------------------------------------------------------|
| Clinical change <input type="checkbox"/><br>Imaging change <input type="checkbox"/><br>Patient choice <input type="checkbox"/><br>Other <input type="checkbox"/> state _____<br>On endocrine treatment at time of decision?<br>Yes <input type="checkbox"/> No <input type="checkbox"/> | <b>Site:</b> At known DCIS <input type="checkbox"/><br>New lesion –<br>same breast, different site <input type="checkbox"/><br>opposite breast <input type="checkbox"/><br><i>If &gt;1 changed/new lesion biopsied please complete separate form for each and state number _____</i> |
|-----------------------------------------------------------------------------------------------------------------------------------------------------------------------------------------------------------------------------------------------------------------------------------------|--------------------------------------------------------------------------------------------------------------------------------------------------------------------------------------------------------------------------------------------------------------------------------------|

**REASSESSMENT AND BIOPSY**

|                                                                                                                                                                                                                                                                                                                                                                                                                                                                                                                                                                                                                                                                                                                                                                                                                                                                                                                                                                                                                                                                                                                                                                          |                                                                                                                                                                                                                                                                                                                                                                                                                                                                                                                                                                                                                                                                                                  |
|--------------------------------------------------------------------------------------------------------------------------------------------------------------------------------------------------------------------------------------------------------------------------------------------------------------------------------------------------------------------------------------------------------------------------------------------------------------------------------------------------------------------------------------------------------------------------------------------------------------------------------------------------------------------------------------------------------------------------------------------------------------------------------------------------------------------------------------------------------------------------------------------------------------------------------------------------------------------------------------------------------------------------------------------------------------------------------------------------------------------------------------------------------------------------|--------------------------------------------------------------------------------------------------------------------------------------------------------------------------------------------------------------------------------------------------------------------------------------------------------------------------------------------------------------------------------------------------------------------------------------------------------------------------------------------------------------------------------------------------------------------------------------------------------------------------------------------------------------------------------------------------|
| <p><b>Mammography</b></p> <p>Date of mammogram _____</p> <p>Digital <input type="checkbox"/> Film/screen <input type="checkbox"/></p> <p>Side: Right <input type="checkbox"/> Left <input type="checkbox"/></p> <p>Site: UOQ <input type="checkbox"/> (tick all that apply)<br/>                 UIQ <input type="checkbox"/><br/>                 LOQ <input type="checkbox"/><br/>                 LIQ <input type="checkbox"/><br/>                 Retroareolar <input type="checkbox"/></p> <p>Does the lesion contain microcalcification?<br/>                 Yes <input type="checkbox"/> No <input type="checkbox"/></p> <p>If yes, most suspicious pattern: (tick one)<br/>                 Casting <input type="checkbox"/><br/>                 Granular <input type="checkbox"/><br/>                 Punctate <input type="checkbox"/></p> <p>Distribution: (tick one)<br/>                 Diffuse <input type="checkbox"/><br/>                 Regional <input type="checkbox"/><br/>                 Grouped <input type="checkbox"/><br/>                 Linear <input type="checkbox"/><br/>                 Segmental <input type="checkbox"/></p> | <p><b>Predominant/new mammographic feature: (tick one)</b></p> <p>Calcification <input type="checkbox"/><br/>                 Mass – well-defined <input type="checkbox"/><br/>                 Mass – ill-defined <input type="checkbox"/><br/>                 Distortion <input type="checkbox"/><br/>                 Spiculate mass <input type="checkbox"/><br/>                 None of above – state _____</p> <p>Maximum size of lesion _____ mm</p> <p><b>BI-RADS breast density: (tick one)</b></p> <p>a <input type="checkbox"/><br/>                 b <input type="checkbox"/><br/>                 c <input type="checkbox"/><br/>                 d <input type="checkbox"/></p> |
|--------------------------------------------------------------------------------------------------------------------------------------------------------------------------------------------------------------------------------------------------------------------------------------------------------------------------------------------------------------------------------------------------------------------------------------------------------------------------------------------------------------------------------------------------------------------------------------------------------------------------------------------------------------------------------------------------------------------------------------------------------------------------------------------------------------------------------------------------------------------------------------------------------------------------------------------------------------------------------------------------------------------------------------------------------------------------------------------------------------------------------------------------------------------------|--------------------------------------------------------------------------------------------------------------------------------------------------------------------------------------------------------------------------------------------------------------------------------------------------------------------------------------------------------------------------------------------------------------------------------------------------------------------------------------------------------------------------------------------------------------------------------------------------------------------------------------------------------------------------------------------------|

**Clinical examination**

P score (1-5) \_\_\_\_\_

Not performed

Not known

**Ultrasound**

U score (1-5) \_\_\_\_\_

Not performed

Not known

**Biopsy**

Date of biopsy \_\_\_\_\_

**Procedure giving definitive diagnosis:**

VAB  Gauge \_\_\_\_\_  
 14G core   
 Other  State \_\_\_\_\_

**Mode:**

Stereo/tomo   
 Ultrasound   
 Freehand

**No. of cores** \_\_\_\_\_
